# Supplementary material for: SHIMMER (1.0): a novel mathematical model for microbial and biogeochemical dynamics in glacier forefield ecosystems
Source: Copernicus journal article supplement (doi:10.5194/gmd-8-3441-2015), 2015-10-28
Supplement: Supplementary file 1 [file Read Me.pdf › Read Me.pdf]

## 1. Hardware and Software Requirement

SHIMMER is written and can be executed in the free open source computing environment and programming language R, which is available for download on the web (<http://www.r-project.org/>). SHIMMER uses the adaptive time-step solver “lsoda” from the deSolve package (Soetaert et al., 2010) **which must also be installed**. On a standard desktop computer running R, the model usually takes less than 1 min to simulate 10 years of succession.

## 2. Download SHIMMER

A package named “SHIMMER”, containing the source code of SHIMMER as well as example input and testing data is available as supplementary material.

The package contains 3 sub-folders:

- 1) Sub-folder named “SHIMMER”, which contains the model source code.
- 2) Sub-folder named “input\_data”, which contains the following time-series of forcings:
  - par.csv – solar radiation (already accounting for inhibition by snow)
  - temp.csv – soil temperature
  - snow.csv – snow depth
  - ICS1.csv – input (deposition) of C substrate (labile)
  - ICS2.csv – input (deposition) of (refractory)
  - IPON1.csv – input (deposition) of organic N (labile)
  - IPON2.csv – input (deposition) organic N (refractory)
  - IPOP1.csv – input (deposition) organic P (labile)
  - IPOP2.csv – input (deposition) organic P (refractory)
  - IDIN.csv – input (deposition) DIN
  - IDIP.csv – input (deposition) DIP
- 3) Testing data
  - Cmic.dat – total microbial biomass
  - CS.dat – total carbon substrate

The package folder should be copied to a local computer such that the directory is:

“C:/RFolder/SHIMMER\_SOURCE/”, or the folder paths contained in SHIMMER.R should be modified (path, pathdr, pathte) according to where the source code is copied to.

## 3. Source Code Files Description

This section provides a brief description of all source code files present in the sub-folder “SHIMMER”. This should be read alongside the manuscript (*SHIMMER (1.0): a novel mathematical*

*model for microbial and biogeochemical dynamics in glacier forefield ecosystems*) for clarity on variables, parameters etc.

#### *SHIMMER.R*

- Specify length of model run here (nyears) (note: must be a positive integer).
- Execute this code (copy and paste into R Console window) to run the model.

#### *Library > SHIMMER\_set\_parameter\_values.R*

- Specify parameter values here.
- The default settings of the model correspond to the optimised Damma Glacier simulation presented in our manuscript.
- See the manuscript for a description of parameters.

#### *Library > SHIMMER\_load\_and\_make\_drivers.R*

- Load the forcing data and replicate for duration of model run (nyears).
- Note: forcing data must be specified as daily values (as per examples).

#### *Library > SHIMMER\_set\_start\_values.R*

- Specify initial conditions here (starting value for each state-variable).

#### *Library > SHIMMER\_model\_definition.R*

- Contains the equations which formulate the model.

#### *Library > SHIMMER\_compute\_totals.R*

- Derive rates from time-series of output variables.

#### *Library > SHIMMER\_construct\_array.R*

- Construct 3-D array from output variables.

#### *Library > SHIMMER\_basic\_plots.R*

- Examples of basic plots of model output.

### **4. Model Operation**

In R, specify working directory to: "C:/RFolder/model/SHIMMER/"

Open SHIMMER.R script and execute in console (note: package "deSolve" (Soetaert et al., 2010) must be installed).

To run the model, copy and paste the *SHIMMER.R* script into the R Console window.

### **5. Output**

Model output is created as variables within R (out, out2 and out\_array). By default, they are not saved locally, however this can be done by using a command such as:

```
write.table(out,file=paste("out","model_run.csv",sep="_"),sep=";",row.names=FALSE)
```

The dataframe “out” is a 2-D time-series of output data comprised of columns for each output (variables, totals and rates), and rows for each day simulated. All units are in  $\mu\text{g g}^{-1}$  dry soil or equivalent.

| Column Name      | Description                             | Column Name       | Description                                             |
|------------------|-----------------------------------------|-------------------|---------------------------------------------------------|
| <i>time</i>      | Day of simulation                       | <i>cum_I_Sub</i>  | Cumulative C substrate input                            |
| <i>A1</i>        | A1 biomass                              | <i>cum_G_X</i>    | Cumulative C substrate from losses (G) and exudates (X) |
| <i>A2</i>        | A2 biomass                              | <i>years</i>      | Year of simulation                                      |
| <i>A3</i>        | A3 biomass                              | <i>A_total</i>    | Total autotrophic biomass                               |
| <i>H1</i>        | H1 biomass                              | <i>H_total</i>    | Total heterotrophic biomass                             |
| <i>H2</i>        | H2 biomass                              | <i>S_total</i>    | Total C substrate                                       |
| <i>H3</i>        | H3 biomass                              | <i>Cmic_total</i> | Total microbial biomass                                 |
| <i>S1</i>        | C substrate (labile)                    | <i>PON_total</i>  | Total organic nitrogen                                  |
| <i>S2</i>        | C substrate (refractory)                | <i>POP_total</i>  | Total organic phosphorus                                |
| <i>DIN</i>       | Dissolved Inorganic Nitrogen            | <i>cum_A</i>      | Cumulative growth (production) of autotrophs            |
| <i>DIP</i>       | Dissolved Inorganic Phosphorus          | <i>cum_H</i>      | Cumulative growth (production) of heterotrophs          |
| <i>PON1</i>      | Organic Nitrogen (labile)               | <i>rate_A1</i>    | Daily A1 growth rate                                    |
| <i>PON2</i>      | Organic Nitrogen (refractory)           | <i>rate_A2</i>    | Daily A2 growth rate                                    |
| <i>POP1</i>      | Organic Phosphorus (labile)             | <i>rate_A3</i>    | Daily A3 growth rate                                    |
| <i>POP2</i>      | Organic Phosphorus (refractory)         | <i>rate_H1</i>    | Daily H1 growth rate                                    |
| <i>cum_A1</i>    | Cumulative growth (production) of A1    | <i>rate_H2</i>    | Daily H2 growth rate                                    |
| <i>cum_A2</i>    | Cumulative growth (production) of A2    | <i>rate_H3</i>    | Daily H3 growth rate                                    |
| <i>cum_A3</i>    | Cumulative growth (production) of A3    | <i>rate_DIC_A</i> | Daily DIC from autotrophs                               |
| <i>cum_H1</i>    | Cumulative growth (production) of H1    | <i>rate_DIC_H</i> | Daily DIC from heterotrophs                             |
| <i>cum_H2</i>    | Cumulative growth (production) of H2    | <i>rate_DIN</i>   | Daily DIN assimilation                                  |
| <i>cum_H3</i>    | Cumulative growth (production) of H3    | <i>rate_nf</i>    | Daily nitrogen fixation                                 |
| <i>cum_DIC_A</i> | Cumulative DIC from autotrophs          | <i>rate_A</i>     | Daily autotrophic growth (production)                   |
| <i>cum_DIC_H</i> | Cumulative DIC from heterotrophs        | <i>rate_H</i>     | Daily heterotrophic growth (production)                 |
| <i>cum_DIN</i>   | Cumulative DIN assimilated into biomass | <i>rate_I_Sub</i> | Daily C substrate input                                 |
| <i>cum_nf</i>    | Cumulative nitrogen fixed               | <i>rate_G_X</i>   | Daily loss (G) and exudate (X) input                    |

The dataframe “out2” is a 2-D time-series of annual totals (or rates), comprised of columns for each output, and rows for each year simulated. All units are in  $\mu\text{g g}^{-1}$  dry soil or equivalent.

| Column Name      | Description                                 | Column Name         | Description                               |
|------------------|---------------------------------------------|---------------------|-------------------------------------------|
| <i>year</i>      | Year of simulation                          | <i>annual_DIC_A</i> | Total annual DIC efflux from autotrophs   |
| <i>annual_A1</i> | Total annual A1 production (biomass growth) | <i>annual_DIC_H</i> | Total annual DIC efflux from heterotrophs |
| <i>annual_A2</i> | Total annual A2 production                  | <i>annual_DIN</i>   | Total annual DIN assimilated from soil    |
| <i>annual_A3</i> | Total annual A3 production                  | <i>annual_nf</i>    | Total annual nitrogen fixed from air      |
| <i>annual_H1</i> | Total annual H1 production                  | <i>annual_A</i>     | Total annual autotrophic production       |
| <i>annual_H2</i> | Total annual H2 production                  | <i>annual_H</i>     | Total annual heterotrophic production     |
| <i>annual_H3</i> | Total annual H3 production                  |                     |                                           |

The array “out\_array” is a 3-D array of data from “out”. The columns (x- axis) represent each output variable, total and rate, the rows (y-axis) represent each day of the year (1-365), and the depth (z- axis) represents each year. For example, out\_array[2,5,3] is the biomass of A1 (the 2<sup>nd</sup> column in out) for the 5<sup>th</sup> day of the 3<sup>rd</sup> year. All units are in  $\mu\text{g g}^{-1}$  dry soil or equivalent. The purpose of the array is that it is simpler to average and sum data across specific time-intervals.

## References

SOETAERT, K., PETZOLDT, T. & SETZER, R. W. 2010. Solving Differential Equations in R: Package deSolve. J Stat Softw, 33, 1-25.
