# Supplementary material for: SHIMMER (1.0): a novel mathematical model for microbial and biogeochemical dynamics in glacier forefield ecosystems
Source: Copernicus journal article supplement (doi:10.5194/gmd-8-3441-2015), 2015-10-28
Supplement: Supplementary file [file gmd-8-3441-2015-supplement-title-page.pdf › gmd-8-3441-2015-supplement-title-page.pdf]

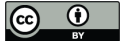

## *Supplement of*

# **SHIMMER (1.0): a novel mathematical model for microbial and biogeochemical dynamics in glacier forefield ecosystems**

**J. A. Bradley et al.**

*Correspondence to:* J. A. Bradley (j.bradley@bristol.ac.uk)

- gmd-8-3441-2015-supplement-title-page.pdf
- Read Me.pdf
- SHIMMER
  - SHIMMER.R
  - library
    - \* SHIMMER\_basic\_plots.R
    - \* SHIMMER\_compute\_totals.R
    - \* SHIMMER\_construct\_array.R
    - \* SHIMMER\_load\_and\_make\_drivers.R
    - \* SHIMMER\_load\_observational\_data.R
    - \* SHIMMER\_model\_definition.R
    - \* SHIMMER\_set\_parameter\_values.R
    - \* SHIMMER\_set\_start\_values.R
- input\_data
  - ICS1.csv
  - ICS2.csv
  - IDIN.csv
  - IDIP.csv
  - IPON1.csv
  - IPON2.csv
  - IPOP1.csv
  - IPOP2.csv
  - par.csv
  - snow.csv

- temp.csv
- testing\_data
  - CS.dat
  - Cmic.dat

The copyright of individual parts of the supplement might differ from the CC-BY 3.0 licence.
